Foundational model aided automatic high-throughput drug screening using self-controlled cohort study

Shenbo Xu

Institute for Data, Systems, and Society, Massachusetts Institute of Technology, Cambridge, MA 02142, USA.

Raluca Cobzaru

Operations Research Center, Massachusetts Institute of Technology, Cambridge, MA 02142, USA.

Stan N. Finkelstein

Institute for Data, Systems, and Society, Massachusetts Institute of Technology, Cambridge, MA 02142, USA.

Roy E. Welsch

Sloan School of Management, Massachusetts Institute of Technology, Cambridge, MA 02142, USA.

Kenney Ng

Center for Computational Health, IBM Research, Cambridge, MA 02142, USA.

Ioanna Tzoulaki

School of Public Health, Imperial College London, London, SW7 2BX, UK

Lefkos Middleton

School of Public Health, Imperial College London, London, SW7 2BX, UK

Withdrawn statement: The authors have withdrawn this manuscript owing to an error in authorship attribution. One of the listed authors was incorrectly included without their knowledge or consent, and the work falls outside their area of expertise. Therefore, the authors do not wish this work to be cited as reference for the project. If you have any questions, please contact the corresponding author.
